# Supplementary material for: Structural and morphological control of Mo doped titania films
Source: Royal Society of Chemistry journal article supplement (doi:10.1039/c1cy00024a), 2011-01-01
Supplement: c1cy00024a.pdf [file c1cy00024a.pdf]

Supporting information

Fig. 1 SEM images of T-2/700 and T-4/700.

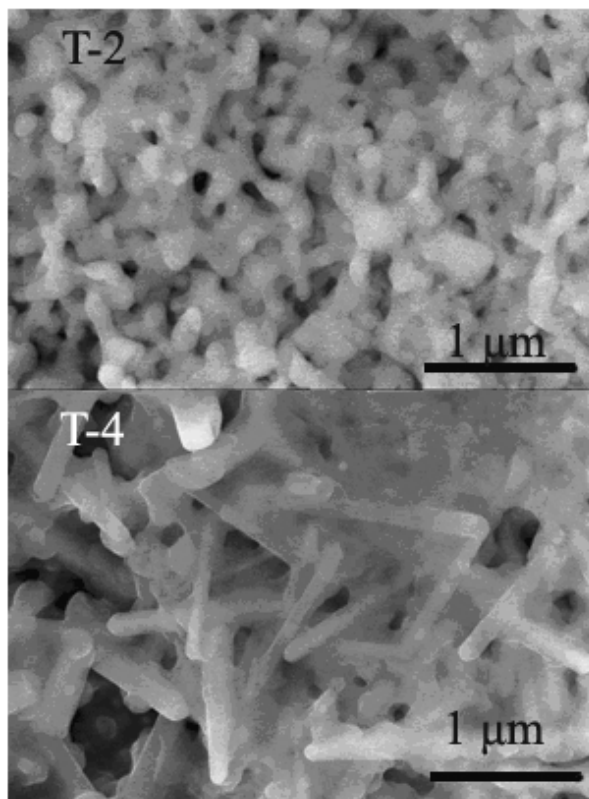

Fig. 2 The EDX spectrum of T-2.

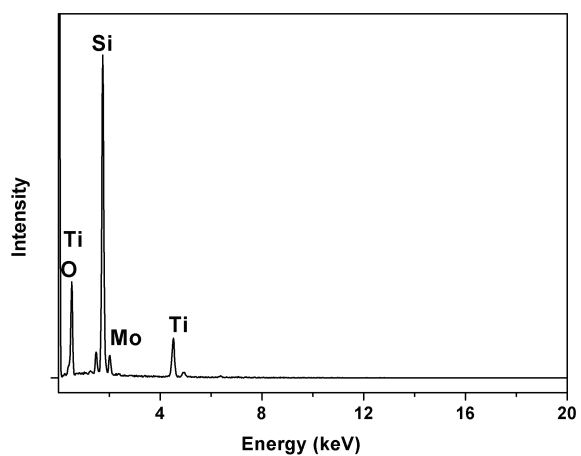

Fig. 3 XRD patterns of TiO<sub>2</sub> films undoped and doped with different amounts of Mo by thermal treatment at 500 °C. A: anatase, R: rutile.

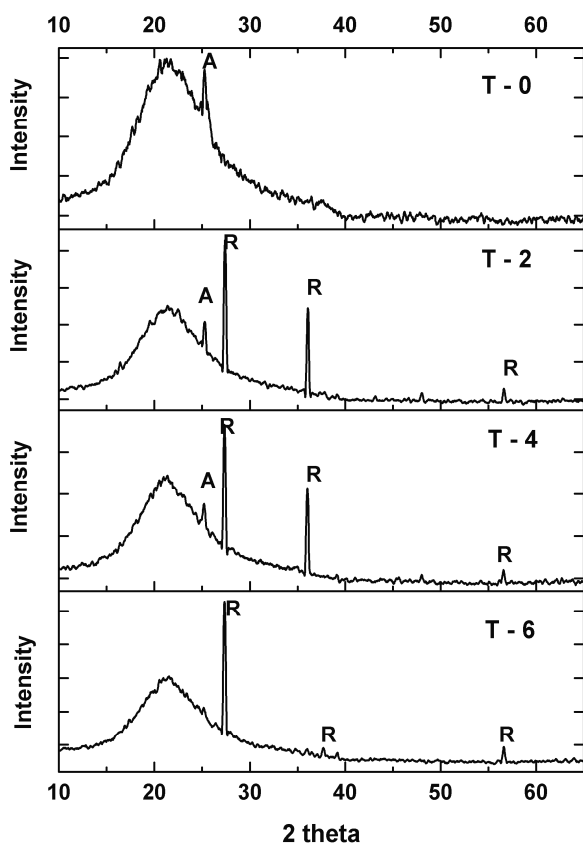

Fig. 4 UV-vis spectrum of undoped and doped titania films.

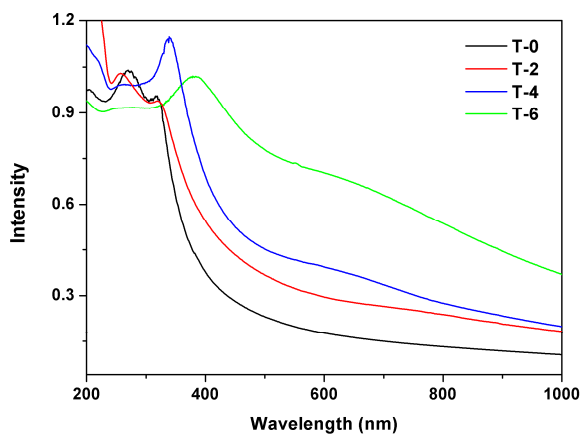

Table 1 Rutile ratio of Mo<sup>6+</sup>-TiO<sub>2</sub> films obtained from thermal treatment under different temperature.

|     | 400 | 500  | 600 |
|-----|-----|------|-----|
| T-0 | 0   | 0    | 17  |
| T-2 | 0   | 71.4 | 100 |
| T-4 | 0   | 72.3 | 100 |
| T-6 | 0   | 78.9 | 100 |
